# Supplementary material for: An Evolutionary Analysis of Antigen Processing and Presentation across Different Timescales Reveals Pervasive Selection
Source: PLOS journal article supplement (doi:10.1371/journal.pgen.1004189), 2014-03-27
Supplement: S4 (10.1371/journal.pgen.1004189.s004) [file journal.pgen.1004189.s004]

Retrieval of 1000 Genomes Pilot project genotype data for 45 APP genes (and a control set of 1000 randomly selected genes)

Discard genes with poor next-generation sequencing accessibility: remove *NCF1* and *NPEPPS*

Nucleotide diversity analysis

Genes with non-exceptional nucleotide diversity

Calculate SFS-based statistics,  $F_{ST}$ , and the DIND test

Genes carrying at outlier variants  
for at least 3 parameters  
(in the 5% tails of empirical distributions)

Identify selection targets in:  
*PSME3*, *PSMB10*, *NRD1*, *CTSL2*, *CD1D*, *CYBB*

Extend analysis to flanking regions (100 Kb)

Remove if flanking genes  
show stronger selection signatures:  
discard *PSME3*

Identify selection targets in *PSMB10*, *NRD1*, *CTSL2*, *CD1D*, *CYBB*,  
*IFI30*, *CTSE*, *MARCH1*, and *MR1*

Integrate functional annotations

**Selective sweep module**

Genes carrying at outlier variants  
for at least 2 parameters  
(in the 1% tails of empirical distributions)

Identify selection targets in:  
*IFI30*, *CTSE*, *MARCH1*, *MR1*

Genes with high nucleotide diversity (*TAP1*, *TAP2*, *ERAP1*,  
*ERAP2*, *CD207*, *PSMB10*, *NCF4*, *CTSB*): balancing selection candidates

Remove 3 genes (*TAP2*, *ERAP1*, and *ERAP2*)  
previously shown to be balancing selection targets

$F_{ST}$  analysis to identify SNP outliers

Sanger sequencing of entire coding regions (*TAP1*, *CD207*, *PSMB10*)  
or of regions carrying  $F_{ST}$  outliers (in *CTSB* and *NCF4*)

MLHKA test

No significant results for  
*CTSB* and *PSMB9*

Significant result in at least one population  
for *NCF4*, *TAP1*, and *CD207*

SFS statistics and coalescent simulations

Genes with at least one significant SFS statistic:  
*NCF4*, *TAP1*, and *CD207*

Calculate TMRCA and perform haplotype analysis

Identify putative selection targets in *NCF4*, *TAP1*, and *CD207*

Integrate functional annotations

**Balancing selection module**
