# Supplementary material for: An Evolutionary Analysis of Antigen Processing and Presentation across Different Timescales Reveals Pervasive Selection
Source: PLOS journal article supplement (doi:10.1371/journal.pgen.1004189), 2014-03-27
Supplement: S12 (10.1371/journal.pgen.1004189.s012) [file journal.pgen.1004189.s012]

**Table S2.** Average non-synonymous/synonymous substitution rate ratio (dN/dS).

| Gene          | Number of species | dN/dS ( $\omega$ ) |
|---------------|-------------------|--------------------|
| <i>B2M</i>    | 33                | 0.21               |
| <i>BCAP31</i> | 32                | 0.13               |
| <i>BLMH</i>   | 39                | 0.12               |
| <i>CALR</i>   | 34                | 0.061              |
| <i>CANX</i>   | 37                | 0.076              |
| <i>CD1D</i>   | 28                | 0.46               |
| <i>CD74</i>   | 26                | 0.21               |
| <i>CD207</i>  | 32                | 0.47               |
| <i>CTSB</i>   | 35                | 0.14               |
| <i>CTSD</i>   | 20                | 0.089              |
| <i>CTSE</i>   | 31                | 0.20               |
| <i>CTSF</i>   | 34                | 0.21               |
| <i>CTSG</i>   | 28                | 0.44               |
| <i>CTSL1</i>  | 11                | 0.36               |
| <i>CTSL2</i>  | 11                | 0.34               |
| <i>CTSS</i>   | 32                | 0.23               |
| <i>CYBA</i>   | 30                | 0.082              |
| <i>CYBB</i>   | 38                | 0.14               |
| <i>ERAP1</i>  | 34                | 0.20               |
| <i>ERAP2</i>  | 26                | 0.35               |
| <i>IFI30</i>  | 28                | 0.25               |
| <i>LGNM</i>   | 37                | 0.15               |
| <i>LNPEP</i>  | 38                | 0.20               |
| <i>MARCH1</i> | 29                | 0.11               |
| <i>MARCH8</i> | 25                | 0.21               |
| <i>MR1</i>    | 30                | 0.40               |
| <i>NCF1</i>   | 24                | 0.096              |
| <i>NCF2</i>   | 32                | 0.21               |
| <i>NCF4</i>   | 32                | 0.14               |
| <i>NPEPPS</i> | 32                | 0.055              |
| <i>NRD1</i>   | 32                | 0.13               |
| <i>PDIA3</i>  | 38                | 0.11               |
| <i>PSMB8</i>  | 34                | 0.16               |
| <i>PSMB9</i>  | 29                | 0.12               |

|               |    |       |
|---------------|----|-------|
| <i>PSMB10</i> | 36 | 0.13  |
| <i>PSME1</i>  | 30 | 0.11  |
| <i>PSME2</i>  | 31 | 0.14  |
| <i>PSME3</i>  | 34 | 0.070 |
| <i>PSMF1</i>  | 36 | 0.21  |
| <i>TAP1</i>   | 35 | 0.34  |
| <i>TAP2</i>   | 26 | 0.23  |
| <i>TAPBP</i>  | 33 | 0.31  |
| <i>TAPBPL</i> | 32 | 0.36  |
| <i>THOP1</i>  | 30 | 0.050 |
| <i>TPP2</i>   | 38 | 0.049 |

---
